# Supplementary material for: Studying Salt-Induced Shifts in Gene Expression Patterns of Glucosinolate Transporters and Glucosinolate Accumulation in Two Contrasting Brassica Species
Source: MDPI journal article supplement (doi:10.3390/metabo14040179), 2024-03-22
Supplement: s1 [file s1]

# Studying Salt-Induced Shifts in Gene Expression Patterns of Glucosinolate Transporters and Glucosinolate Accumulation in Two Contrasting *Brassica* Species

Samia Fatima <sup>1</sup>, Muhammad Omar Khan <sup>1</sup>, Nadia Iqbal <sup>1</sup>, Muhammad Mudassar Iqbal <sup>1</sup>, Huma Qamar <sup>2,3</sup>, Muhammad Imtiaz <sup>1</sup>, Penny Hundleby <sup>4</sup>, Zhengyi Wei <sup>5,\*</sup> and Niaz Ahmad <sup>1,\*</sup>

- <sup>1</sup> National Institute for Biotechnology and Genetic Engineering College (NIBGE-C), Pakistan Institute for Engineering and Applied Sciences (PIEAS), Faisalabad 38000, Pakistan; saminafatime@nibge.org (S.F.); muhammadkhan@nibge.org (M.O.K.); nadiaiqba@nibge.org (N.I.); muhammadiqbal@nibge.org (M.M.I.); m.imtiazpk92@nibge.org (M.I.)
  - <sup>2</sup> Oilseeds Research Institute, Ayub Agricultural Research Institute, Faisalabad 38000, Pakistan; huma.qamar@research.uwa.edu.au
  - <sup>3</sup> School of Biological Sciences, The University of Western Australia, Crawley, WA 6009, Australia
  - <sup>4</sup> Department of Crop Genetics, John Innes Centre, Norwich Research Park, Norwich NR4 7UH, UK; penny.hundleby@jic.ac.uk
  - <sup>5</sup> Maize Research Institute, Guangxi Academy of Agricultural Sciences, Nanning 530007, China
- \* Correspondence: weizy80@gxaas.net or weizy80@163.com (Z.W.); nahmad@nibge.org or niazbloch@yahoo.com (N.A.)

**Table S1: List of primers used for expression analysis in this study**

| Sr No | Primer Name | Sequence (5'— 3')      |
|-------|-------------|------------------------|
| 1     | GTR2A2-F    | GATTGCAACGGTACACAGGA   |
| 2     | GTR2A2-R    | CCATCTTGACATCACCAAGAA  |
| 3     | GTR2B1/C2-F | CACAGGACGACGCAGAACT    |
| 4     | GTR2B1/C2-R | AGCAAAATTAACCGCCAAGA   |
| 5     | GTR2A1-F    | TGATTGCAATGGTTCACAGG   |
| 6     | GTR2A1-R    | TTCCAGCAATCATGAAATAGAA |
| 7     | GTR1B1/A2-F | GAGCGGGGATCTTCTTTG     |
| 8     | GTR1B1/A2-R | TCCATCCCTAGAGTCTGTTT   |
| 9     | ACT-F       | TGTGACAATGGAAGTGAAT    |
| 10    | ACT-R       | GACCCATCCCAACCATGA     |

**Table S2: GTR genes and their respective protein properties.** The table includes Gene IDs, Location of the gene on the chromosomes, transcript and protein length, molecular weight (Da), isoelectronic point (pI), grand average of hydropathy values (GRAVY) and sub-cellular localization of proteins.

| Gene ID            | Gene Name        | Chr. No. | Strand | Location          | Transcript length | Protein length | Mol. Weight (Da) | pI   | GRAVY | Sub-cellular localization |
|--------------------|------------------|----------|--------|-------------------|-------------------|----------------|------------------|------|-------|---------------------------|
| AT3G47960.1        | <i>AtGTR1</i>    | 3        | -      | 17697942-17700833 | 1911              | 636            | 71039.51         | 9.11 | 0.197 | Plasma membrane           |
| BolC3t18961H       | <i>BolGTR1C1</i> | C3       | +      | 45537027-45539805 | 1905              | 634            | 70460.97         | 8.71 | 0.247 | Plasma membrane           |
| BolC1t03184H       | <i>BolGTR1C2</i> | C1       | +      | 24730858-24733298 | 1926              | 641            | 71173.45         | 8.96 | 0.127 | Plasma membrane           |
| BolC8t51846H       | <i>BolGTR1C3</i> | C8       | -      | 45270014-45272334 | 1764              | 587            | 64966.96         | 9.22 | 0.282 | Plasma membrane           |
| BniB08g061180.2N   | <i>BniGTR1B1</i> | B8       | -      | 57886043-57888835 | 1848              | 615            | 68205.34         | 8.61 | 0.239 | Plasma membrane           |
| BniB06g024230.2N   | <i>BniGTR1B2</i> | B6       | +      | 14337898-14340309 | 1905              | 634            | 70522.05         | 8.71 | 0.268 | Plasma membrane           |
| BniB05g052360.2N   | <i>BniGTR1B3</i> | B5       | -      | 44394313-44396700 | 1854              | 617            | 68368.62         | 8.86 | 0.232 | Plasma membrane           |
| BraA06g019540.3.5C | <i>BraGTR1A1</i> | A6       | +      | 10801141-10804360 | 1848              | 615            | 68053.42         | 8.99 | 0.276 | Plasma membrane           |
| BraA06g025210.3.5C | <i>BraGTR1A2</i> | A6       | -      | 16715892-16718716 | 1905              | 634            | 70567.02         | 8.79 | 0.211 | Plasma membrane           |
| BraA01g025200.3.5C | <i>BraGTR1A3</i> | A1       | +      | 14570408-14573089 | 1815              | 604            | 67112.62         | 9.33 | 0.307 | Plasma membrane           |
| A06p19700.1_BnaDAR | <i>BnaGTR1A1</i> | A6       | +      | 11067707-11070559 | 1848              | 615            | 68069.42         | 8.99 | 0.272 | Plasma membrane           |
| A06p27390.1_BnaDAR | <i>BnaGTR1A2</i> | A6       | -      | 32634402-32637103 | 1905              | 634            | 70552.05         | 8.86 | 0.22  | Plasma membrane           |
| A01p25730.1_BnaDAR | <i>BnaGTR1A3</i> | A1       | +      | 14825160-14827590 | 1926              | 641            | 71245.69         | 9.02 | 0.152 | Plasma membrane           |
| C03p72210.1_BnaDAR | <i>BnaGTR1C1</i> | C3       | -      | 55171571-55174464 | 1848              | 615            | 68172.52         | 8.92 | 0.254 | Plasma membrane           |
| C03p66900.1_BnaDAR | <i>BnaGTR1C2</i> | C3       | +      | 45114907-45117916 | 1905              | 634            | 70460.97         | 8.71 | 0.247 | Plasma membrane           |
| C01p32480.1_BnaDAR | <i>BnaGTR1C3</i> | C1       | +      | 24863749-24866191 | 1926              | 641            | 71310.64         | 8.9  | 0.13  | Plasma membrane           |
| BjuVA06G19500      | <i>BjuGTR1A1</i> | A6       | +      | 10676591-10679465 | 1848              | 615            | 68127.46         | 8.92 | 0.263 | Plasma membrane           |
| BjuVA06G26150      | <i>BjuGTR1A2</i> | A6       | -      | 28729916-28732684 | 1905              | 634            | 70567.02         | 8.79 | 0.211 | Plasma membrane           |
| BjuVA01G26580      | <i>BjuGTR1A3</i> | A1       | +      | 14804496-14806848 | 1848              | 615            | 68053.21         | 9    | 0.228 | Plasma membrane           |
| BjuVB08G47510      | <i>BjuGTR1B1</i> | B8       | -      | 53659983-53663145 | 1848              | 615            | 68205.34         | 8.61 | 0.239 | Plasma membrane           |
| BjuVB06G23560      | <i>BjuGTR1B2</i> | B6       | +      | 15676902-15679502 | 1905              | 634            | 70544.01         | 8.61 | 0.26  | Plasma membrane           |
| BjuVB05G42900      | <i>BjuGTR1B3</i> | B5       | +      | 31049142-31051530 | 1854              | 617            | 68340.53         | 8.8  | 0.233 | Plasma membrane           |
| BcaB01g00859       | <i>BcaGTR1B1</i> | B1       | +      | 7365410-7368203   | 1848              | 615            | 68205.34         | 8.61 | 0.239 | Plasma membrane           |
| BcaB02g10681       | <i>BcaGTR1B2</i> | B2       | +      | 30683181-30685582 | 1905              | 634            | 70544.01         | 8.61 | 0.26  | Plasma membrane           |
| BcaB05g23096       | <i>BcaGTR1B3</i> | B5       | -      | 16137173-16139533 | 1854              | 617            | 68402.68         | 8.92 | 0.236 | Plasma membrane           |
| BcaC01g01757       | <i>BcaGTR1C1</i> | C1       | +      | 18324250-18326854 | 1848              | 615            | 68226.55         | 8.86 | 0.253 | Plasma membrane           |
| BcaC01g02298       | <i>BcaGTR1C2</i> | C1       | -      | 29981307-29984085 | 1905              | 634            | 70460.97         | 8.71 | 0.247 | Plasma membrane           |
| BcaC09g49832       | <i>BcaGTR1C3</i> | C9       | -      | 25815759-25818111 | 1836              | 611            | 67635.63         | 8.89 | 0.224 | Plasma membrane           |
| AT5G62680.1        | <i>AtGTR2</i>    | 5        | -      | 25165137-25167943 | 1851              | 616            | 67890.98         | 9.1  | 0.284 | Plasma membrane           |
| BolC2t12292H       | <i>BolGTR2C1</i> | C2       | -      | 61815970-61818365 | 1839              | 612            | 67626.82         | 8.92 | 0.333 | Plasma membrane           |
| BolC3t18666H       | <i>BolGTR2C2</i> | C3       | +      | 42224839-42227233 | 1839              | 612            | 67725.12         | 8.98 | 0.335 | Plasma membrane           |
| BolC9t53791H       | <i>BolGTR2C3</i> | C9       | -      | 5348144-5350524   | 1839              | 612            | 67447.53         | 8.87 | 0.348 | Plasma membrane           |
| BniB04g002130.2N   | <i>BniGTR2B1</i> | B4       | +      | 1022088-1024566   | 1839              | 612            | 67716.02         | 9.01 | 0.329 | Plasma membrane           |
| BniB06g010940.2N   | <i>BniGTR2B2</i> | B6       | -      | 5574061-5576460   | 1839              | 612            | 67786.23         | 9.1  | 0.331 | Plasma membrane           |
| BniB07g041760.2N   | <i>BniGTR2B3</i> | B7       | -      | 47577010-47579359 | 1821              | 606            | 66729.74         | 8.78 | 0.335 | Plasma membrane           |

|                    |                  |           |   |                    |      |     |          |      |       |                 |
|--------------------|------------------|-----------|---|--------------------|------|-----|----------|------|-------|-----------------|
| BraA02g045700.3.5C | <i>BraGTR2A1</i> | A2        | - | 30298054-30300823  | 1839 | 612 | 67652.94 | 8.98 | 0.34  | Plasma membrane |
| BraA06g027380.3.5C | <i>BraGTR2A2</i> | A6        | - | 18424905 -18427697 | 1839 | 612 | 67739.14 | 8.98 | 0.335 | Plasma membrane |
| BraA09g007530.3.5C | <i>BraGTR2A3</i> | A9        | - | 4272215 -4274974   | 1839 | 612 | 67644.82 | 8.79 | 0.334 | Plasma membrane |
| A02p42460.1_BnaDAR | <i>BnaGTR2A1</i> | A2        | - | 32205553 -32208391 | 1839 | 612 | 67640.89 | 8.98 | 0.332 | Plasma membrane |
| A06p29420.1_BnaDAR | <i>BnaGTR2A2</i> | A6        | - | 34287866 -34290565 | 1839 | 612 | 67797.18 | 8.91 | 0.33  | Plasma membrane |
| A09p07810.1_BnaDAR | <i>BnaGTR2A3</i> | A9        | - | 4463087 -4465822   | 1839 | 612 | 67644.82 | 8.79 | 0.334 | Plasma membrane |
| C02p62380.1_BnaDAR | <i>BnaGTR2C1</i> | C2        | - | 60482227 -60490459 | 1839 | 612 | 67626.82 | 8.92 | 0.333 | Plasma membrane |
| C03p64110.1_BnaDAR | <i>BnaGTR2C2</i> | C3        | + | 41808405 -41811139 | 1839 | 612 | 67725.12 | 8.98 | 0.335 | Plasma membrane |
| C09p08780.1_BnaDAR | <i>BnaGTR2C3</i> | C9        | - | 5199813 -5202640   | 1836 | 611 | 67378.42 | 8.86 | 0.137 | Plasma membrane |
| BjuVA02G47610      | <i>BjuGTR2A1</i> | A2        | - | 31650239-31652620  | 1839 | 612 | 67656.89 | 8.98 | 0.328 | Plasma membrane |
| BjuVA06G28410      | <i>BjuGTR2A2</i> | A6        | - | 30414065-30416809  | 1839 | 612 | 67797.18 | 8.91 | 0.33  | Plasma membrane |
| BjuVA09G07610      | <i>BjuGTR2A3</i> | A9        | - | 4182819- 4194805   | 1581 | 526 | 57986.02 | 9    | 0.452 | Plasma membrane |
| BjuVB04G01960      | <i>BjuGTR2B1</i> | B4        | + | 1112996-1115472    | 1839 | 612 | 67625.89 | 9.02 | 0.326 | Plasma membrane |
| BjuVB06G11810      | <i>BjuGTR2B2</i> | B6        | - | 6701332-6704576    | 1839 | 612 | 67786.23 | 9.1  | 0.331 | Plasma membrane |
| BjuVB07G18470      | <i>BjuGTR2B3</i> | B7        | + | 10890421-10893018  | 1821 | 606 | 66694.69 | 8.78 | 0.333 | Plasma membrane |
| BcaB02g09673       | <i>BcaGTR2B1</i> | B2        | - | 21952429 -21954836 | 1839 | 612 | 67758.17 | 9.1  | 0.327 | Plasma membrane |
| BcaNung01385       | <i>BcaGTR2B2</i> | Contig503 | + | 38887-41234        | 1821 | 606 | 66694.69 | 8.78 | 0.333 | Plasma membrane |
| BcaB07g29850       | <i>BcaGTR2B3</i> | B7        | - | 1225649-1228114    | 1776 | 591 | 65345.13 | 8.64 | 0.361 | Plasma membrane |
| BcaC01g02504       | <i>BcaGTR2C1</i> | C1        | - | 32914562 -32924437 | 1836 | 611 | 67586.9  | 8.91 | 0.343 | Plasma membrane |
| BcaC03g18168       | <i>BcaGTR2C2</i> | C3        | - | 63135183-63154915  | 2223 | 740 | 81415.64 | 9.54 | 0.106 | Plasma membrane |
| BcaC04g23397       | <i>BcaGTR2C3</i> | C4        | + | 59044137-59046512  | 1836 | 611 | 67391.42 | 8.78 | 0.329 | Plasma membrane |



**Table S3:  $K_a$ ,  $K_s$  and  $K_a/K_s$  values of the *GTR* gene pairs**

| <b><i>GTR 1</i></b> | <b><i>GTR 2</i></b> | <b><math>K_a</math></b> | <b><math>K_s</math></b> | <b><math>K_a/K_s</math></b> |
|---------------------|---------------------|-------------------------|-------------------------|-----------------------------|
| BnaGTR1A1           | BjuGTR1A1           | 0.0007                  | 0.0138                  | 0.0514                      |
| BnaGTR1A3           | BjuGTR1A3           | 0.0014                  | 0.0068                  | 0.2110                      |
| BnaGTR1C2           | BjuGTR1A2           | 0.0052                  | 0.0467                  | 0.1112                      |
| BnaGTR2A1           | BnaGTR2C1           | 0.0007                  | 0.0762                  | 0.0094                      |
| BnaGTR2A2           | BnaGTR2C2           | 0.0007                  | 0.0712                  | 0.0100                      |
| BnaGTR2A3           | BjuGTR2A3           | 0.0294                  | 0.0638                  | 0.4610                      |

**Table S4: Mean squares and levels of significance from ANOVA for (a) biochemical parameters, (b) non-enzymatic antioxidants, (c) GTR genes and (d) glucosinolates in *B. juncea* and *B. napus* under NaCl stress. (\*\*\*, \*\*, \* at  $p = 0.0001$ ,  $0.001$  and  $0.01$ , respectively).**

a) Response: Biochemical parameters

| Source of variation | DF | H <sub>2</sub> O <sub>2</sub> | MDA       | Phenolics    | TFA           | TSP        |
|---------------------|----|-------------------------------|-----------|--------------|---------------|------------|
| Species (Sp)        | 1  | 21.3942***                    | 26.731*   | 0.0000445    | 0.00103397*** | 3.8068***  |
| NaCl                | 2  | 6.4412***                     | 77.217*** | 0.0038252*** | 0.00201673*** | 24.6687*** |
| Sp x NaCl           | 2  | 0.4565*                       | 0.873     | 0.0001121    | 0.00033979*** | 2.19***    |
| Error               | 12 | 0.0972                        | 2.902     | 0.0002278    | 0.00000442    | 0.0959     |

b) Response: Non-enzymatic antioxidants

| Source of variation | DF | POD           | CAT      | APX          | SOD        |
|---------------------|----|---------------|----------|--------------|------------|
| Species (Sp)        | 1  | 0.0001846*    | 18.76*** | 0.0047261*** | 2.041      |
| NaCl                | 2  | 0.00197793*** | 4.3932*  | 0.0014783*   | 187.963*** |
| Sp x NaCl           | 2  | 0.00021392*   | 0.9233g  | 0.0001319    | 21.086     |
| Error               | 12 | 0.00003854    | 0.7102   | 0.0002205    | 7.936      |

c) Response: GTR genes

| Source of variations | DF | GTR1A2/B1 | GTR2A2     | GTR2A1    | GTR2B1/C2 |
|----------------------|----|-----------|------------|-----------|-----------|
| Species (Sp)         | 1  | 53.125*** | 2.134      | 38.268    | 37.270**  |
| Plant part (PP)      | 4  | 34.32***  | 146.603**  | 27.604*   | 35.596*** |
| Sp x PP              | 4  | 41.097*** | 272.908*** | 52.086*** | 65.552*** |
| Error                | 80 | 2.457     | 34.9       | 10.121    | 4.966     |

d) Response: Glucosinolates

| Source of variations | DF | Sum Sq | Mean Sq | F - Value | Pr (> F)            | Significance |
|----------------------|----|--------|---------|-----------|---------------------|--------------|
| Species              | 1  | 37868  | 37868   | 1900.880  | $2 \times 10^{-16}$ | ***          |
| NaCl                 | 2  | 180    | 90      | 4.509     | 0.0145              | *            |
| Residuals            | 68 | 1355   | 20      | —         | —                   | —            |

[illegible]













**Figure S1: Multiple sequence alignment of GTR proteins from *Arabidopsis*, *B. juncea* and *B. napus*.**

Multiple sequence alignment was performed by submitting the protein sequences into online available MUSCLE alignment tool using default settings. Different conserved amino acids are represented by different color codes in the picture. The accession number of the query proteins are given as under: AtGTR1 (AT3G47960.1), BnaGTR1A1 (A06p19700.1\_BnaDAR), BnaGTR1A2 (A06p27390.1\_BnaDAR), BnaGTR1A3 (A01p25730.1\_BnaDAR), BnaGTR1C1 (C03p72210.1\_BnaDAR), BnaGTR1C2 (C03p66900.1\_BnaDAR), BnaGTR1C3 (C01p32480.1\_BnaDAR), BjuGTR1A1 (BjuVA06G19500), BjuGTR1A2 (BjuVA06G26150), BjuGTR1A3 (BjuVA01G26580), BjuGTR1B1 (BjuVB08G47510), BjuGTR1B2 (BjuVB06G23560), BjuGTR1B3 (BjuVB05G42900), BnaGTR2A1 (A02p42460.1\_BnaDAR), BnaGTR2A2 (A06p29420.1\_BnaDAR), BnaGTR2A3 (A09p07810.1\_BnaDAR), BnaGTR2C1 (C02p62380.1\_BnaDAR), BnaGTR2C2 (C03p64110.1\_BnaDAR), BnaGTR2C3 (C09p08780.1\_BnaDAR), BjuGTR2A1 (BjuVA02G47610), BjuGTR2A2 (BjuVA06G28410), BjuGTR2A3 (BjuVA09G07610), BjuGTR2B1 (BjuVB04G01960), BjuGTR2B2 (BjuVB06G11810), BjuGTR2B3 (BjuVB07G18470).

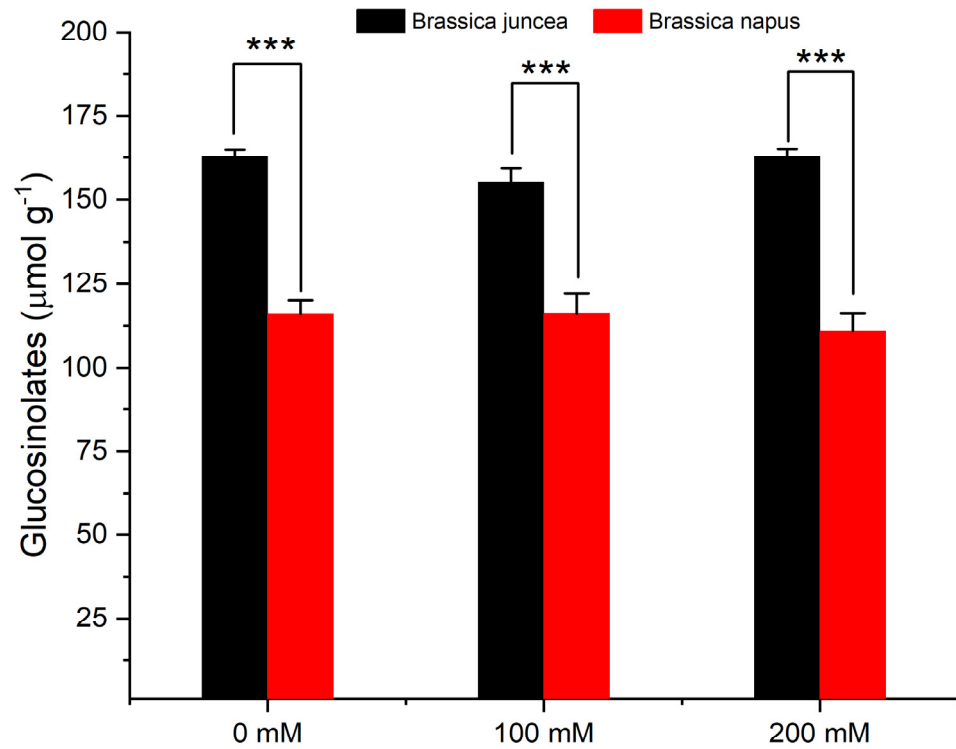

**Figure S2: Concentration of overall glucosinolates content in seed.** Plants of *B. juncea* (blue lines) and *B. napus* (orange) were grown under 0, 100 and 200 mM NaCl concentrations. Values represent means  $\pm$  SD from three biological replicates per treatment. Data points represent the means  $\pm$  SD of three biological replicates. Significant differences are shown with different asterisks (Tukey's HSD,  $p = 0.05$ .) Significant codes: \*\*\*, \*\*, \* at  $p = 0.0001$ , 0.001 and 0.01, respectively.)
